# Supplementary material for: Interfacial defect complex at the MgO/SrTiO3heterojunction and its electronic impact
Source: Royal Society of Chemistry journal article supplement (doi:10.1039/c4ra08961h), 2014-09-24
Supplement: c4ra08961h1.pdf [file c4ra08961h1.pdf]

Supplementary Information for

**Interfacial Defect Complex at the MgO/SrTiO<sub>3</sub>  
Heterojunction and its Electronic Impact**

Junjie Li,<sup>a,b,†</sup> Shuhui Lv,<sup>b,c,†</sup> Chunlin Chen,<sup>b</sup> Sumei Huang,<sup>a</sup> and Zhongchang Wang<sup>b,\*</sup>

<sup>a</sup>*Engineering Research Center for Nanophotonics and Advanced Instrument, Ministry of Education, & Department of Physics, East China Normal University, North Zhongshan Road 3663, Shanghai 200062, China*

<sup>b</sup>*Advanced Institute for Materials Research, Tohoku University, 2-1-1 Katahira, Aoba-ku, Sendai 980-8577, Japan*

<sup>c</sup>*School of Materials Science and Engineering, Changchun University of Science and Technology, Changchun 130022, China*

Figure S1

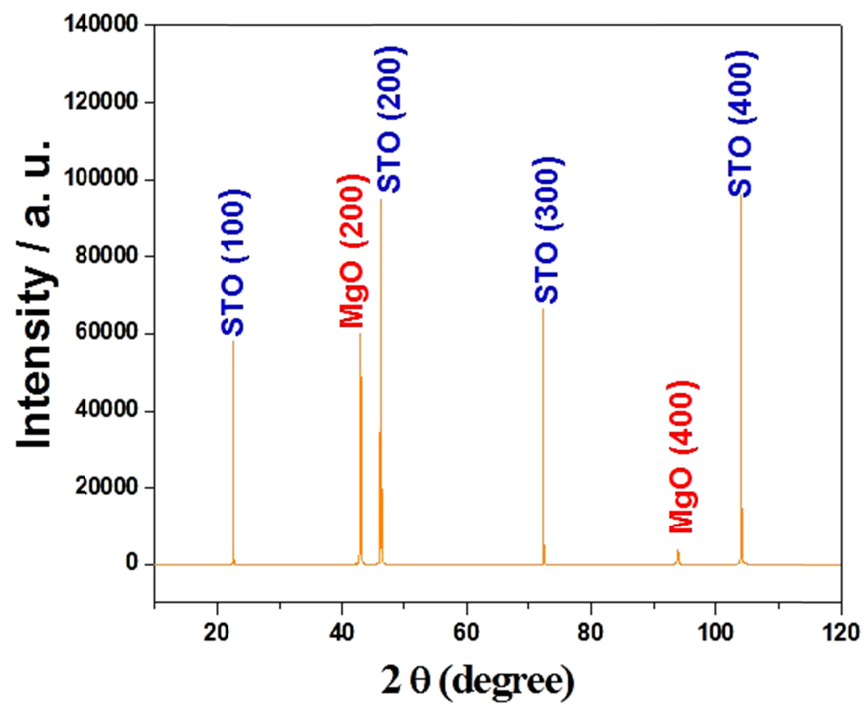

FIG. S1. XRD pattern of MgO thin film grown on the SrTiO<sub>3</sub> substrate.

Figure S2

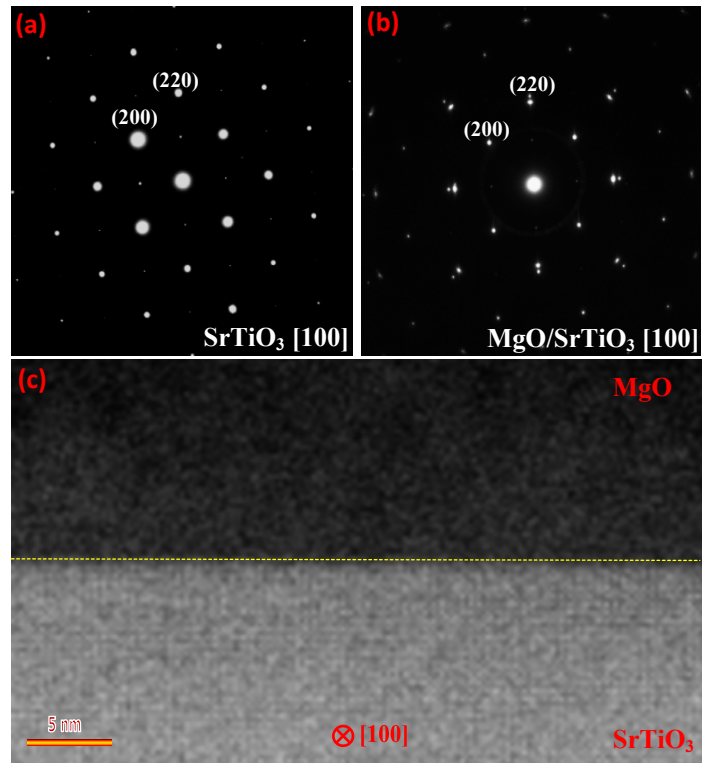

FIG. S2. Selected area diffraction patterns taken at (a) substrate and (b) interface, confirming the epitaxial orientation relations  $(001)\text{MgO} // (001)\text{SrTiO}_3$  and  $[100]\text{MgO} // [100]\text{SrTiO}_3$ . (c) Low-magnification STEM image, revealing the flatness of the interface at the large scale.
